# Supplementary material for: Enhanced thermoelectric properties of BaZn2Sb2via a synergistic optimization strategy using co-doped Na and Sr
Source: Royal Society of Chemistry journal article supplement (doi:10.1039/c6ta03012b), 2016-01-01
Supplement: c6ta03012b1.pdf [file c6ta03012b1.pdf]

## Enhanced thermoelectric properties of $\text{BaZn}_2\text{Sb}_2$ via synergistic optimization strategy of co-doped Na and Sr

Ruijuan Yan,<sup>a</sup> Wanyu Lv,<sup>a</sup> Ke Wang,<sup>a</sup> Kai Guo,<sup>\*a</sup> Xinxin Yang,<sup>\*a</sup> Jun Luo<sup>a</sup>  
and Jing-tai Zhao<sup>ab</sup>

<sup>a</sup>School of Materials Science and Engineering, Shanghai University, Shanghai 200444, China

<sup>b</sup>State Key Laboratory of Advanced Special Steel, Shanghai University, Shanghai 200444, China

### Supplementary Information:

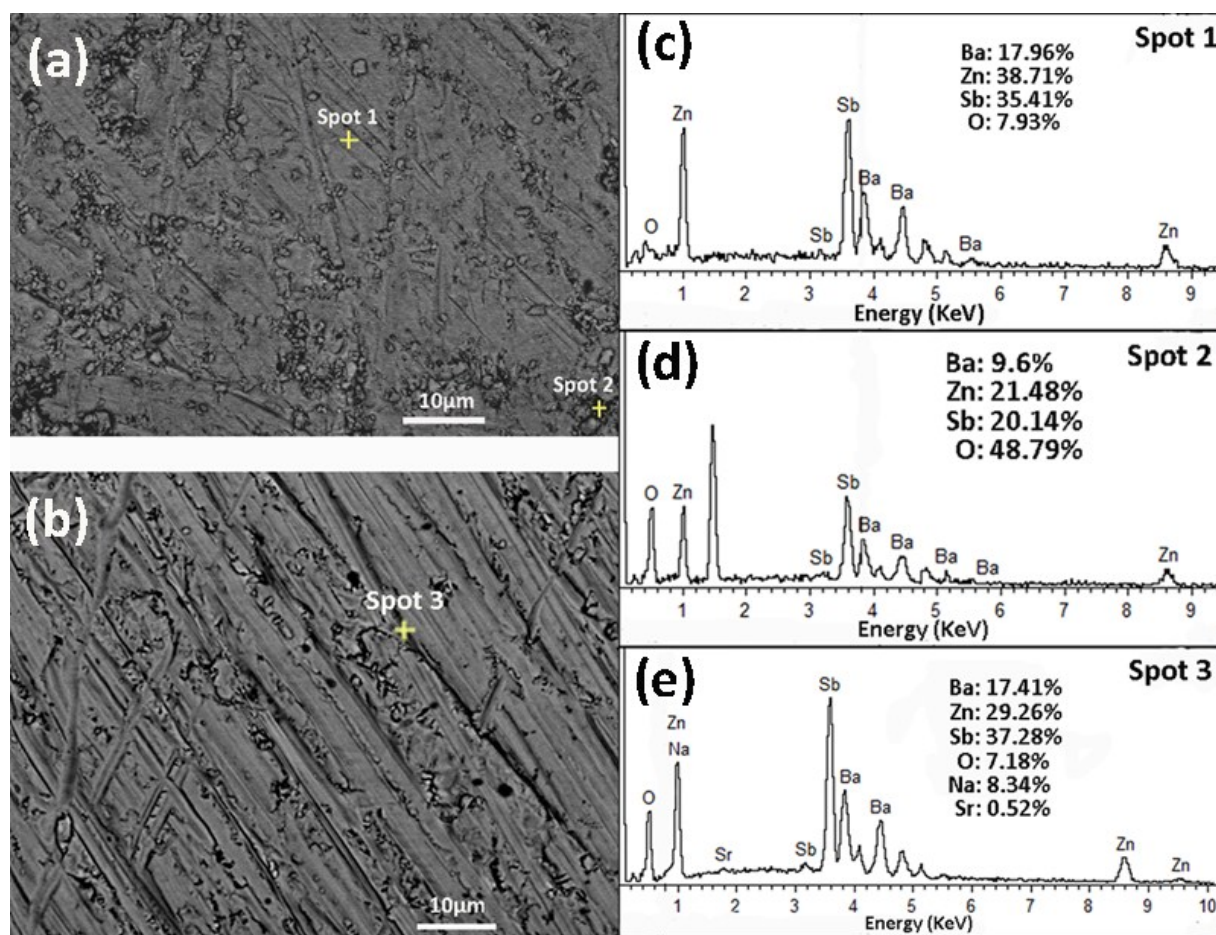

Fig. S1 The BSEM of (a)  $\text{BaZn}_2\text{Sb}_2$  sample, (b)  $\text{Ba}_{0.92}\text{Na}_{0.06}\text{Sr}_{0.02}\text{Zn}_2\text{Sb}_2$  sample and (c) (d) (e) EDS analysis results.

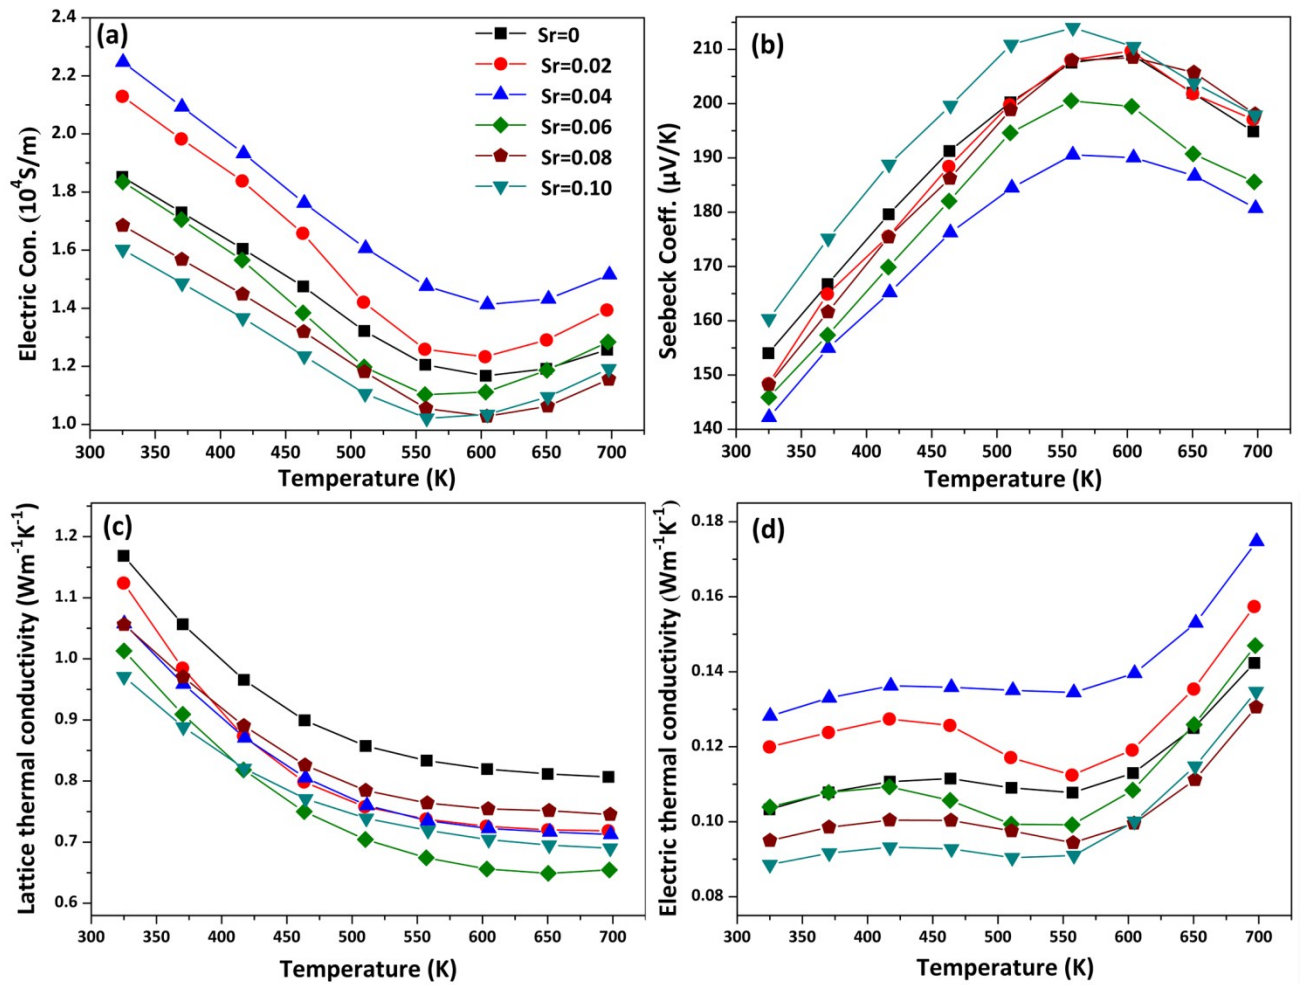

Fig. S2 (a) The electric conductivity (b) the Seebeck coefficient (c) the lattice thermal conductivity and (d) the electric thermal conductivity of Sr doped  $\text{BaZn}_2\text{Sb}_2$  samples.

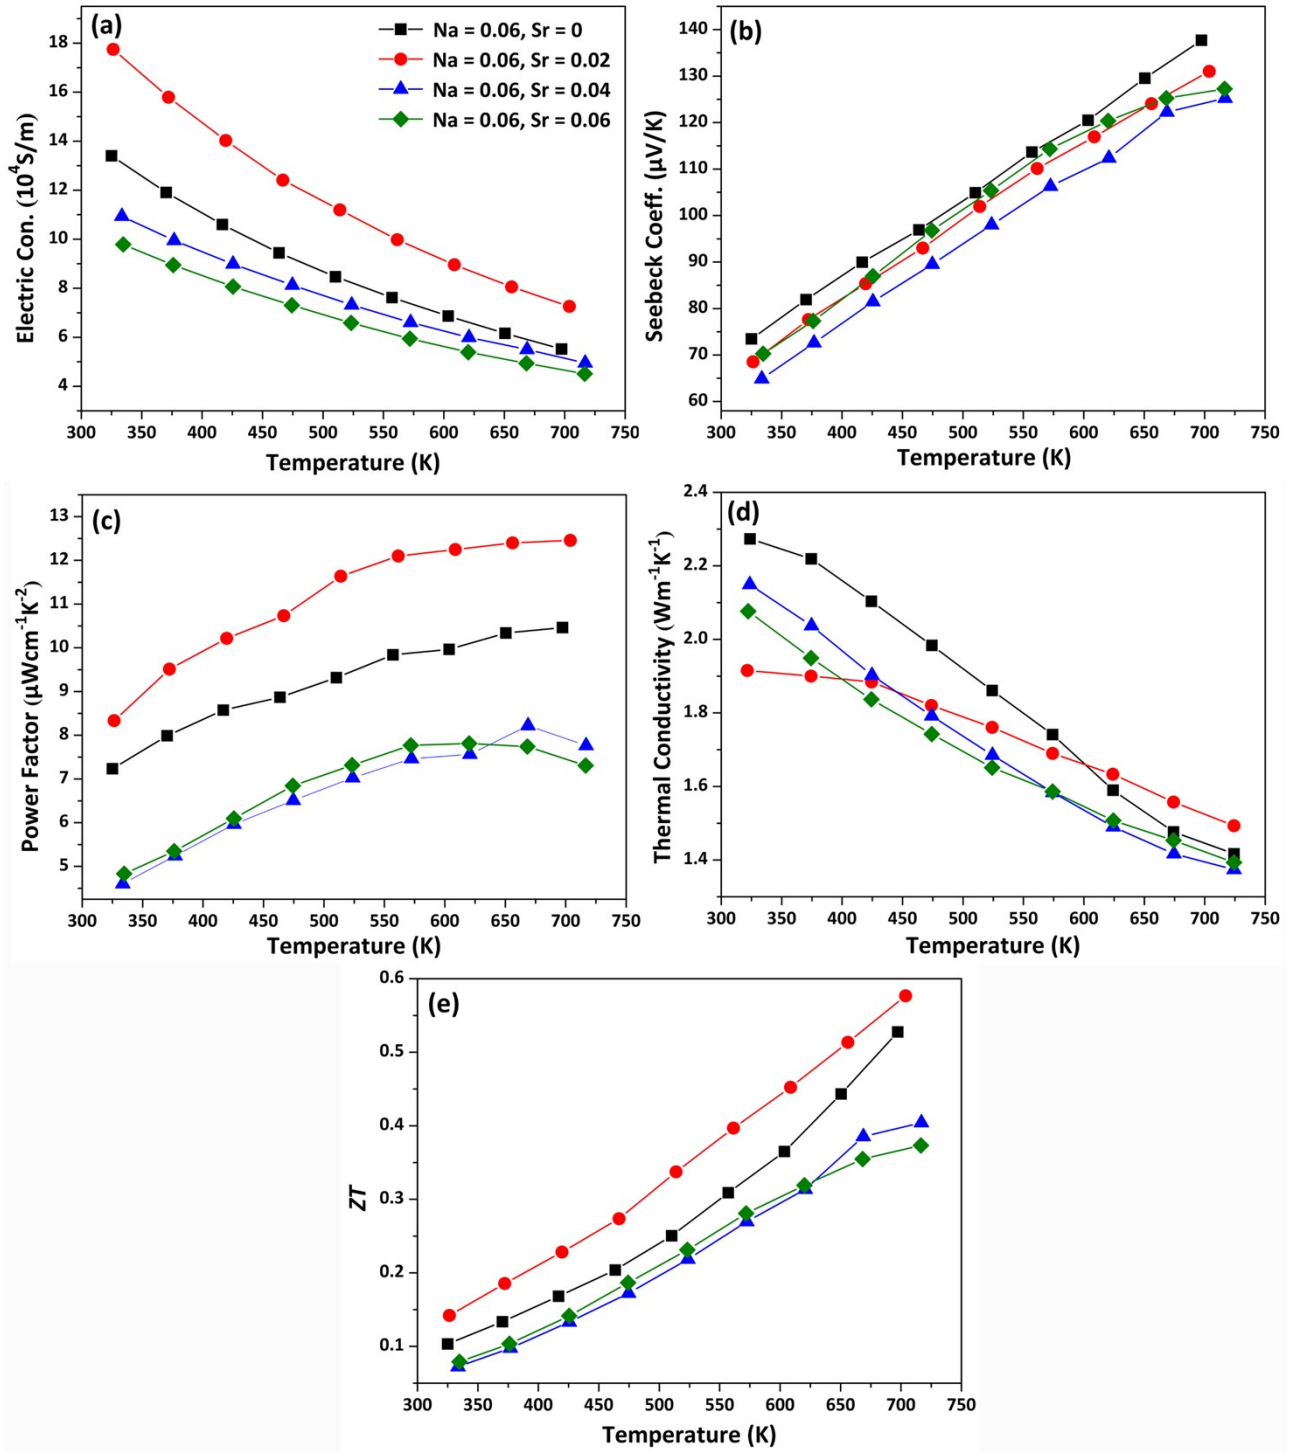

Fig. S3 Temperature dependence of (a) the electrical conductivity, (b) the Seebeck coefficient, (c) the power factor, (d) the thermal conductivity and (e) the electrical thermal conductivity for  $\text{BaNa}_{0.06}\text{Sr}_y\text{Zn}_2\text{Sb}_2$  samples.
